# Supplementary material for: Synthesis, molecular docking and in vitro antiproliferative activity of novel pyrano[3,2-c]carbazole derivatives
Source: Royal Society of Chemistry journal article supplement (doi:10.1039/c6nj01580h), 2016-01-01

## Supporting Information for

### Synthesis, Molecular Docking and *in vitro* Antiproliferative activity of Novel Pyrano[3,2-*c*]carbazole derivatives

Pannala Padmaja,<sup>\*a</sup> Basireddy V. Subba Reddy,<sup>b</sup> Nishant Jain,<sup>b</sup> Srinivasa Rao Mutheneni,<sup>b</sup> Priyanka Bollepli,<sup>b</sup> Sowjanya Polepalli,<sup>b</sup> Gundla Rambabu<sup>c</sup> Pedavenkatagari Narayana Reddy<sup>\*c</sup>

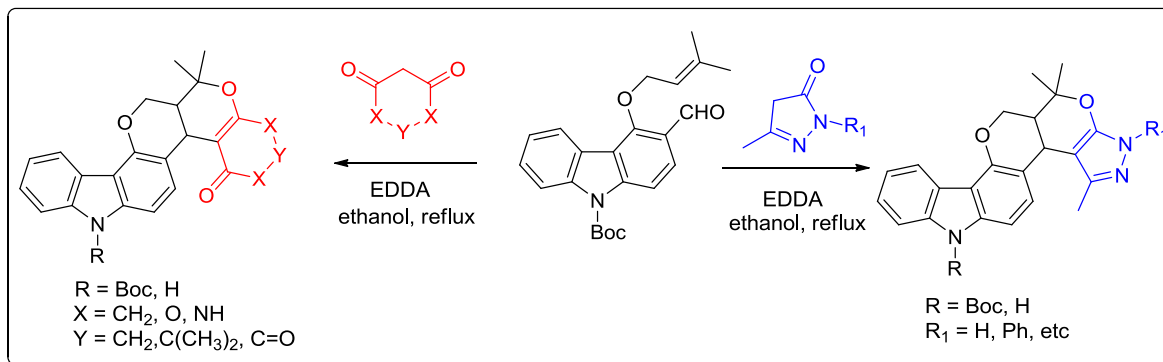

### Table of content

1. Copies of <sup>1</sup>H and <sup>13</sup>C NMR spectra of products

2-16

<sup>1</sup>H NMR of 9 in CDCl<sub>3</sub>

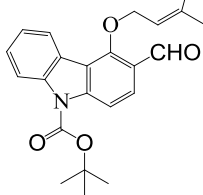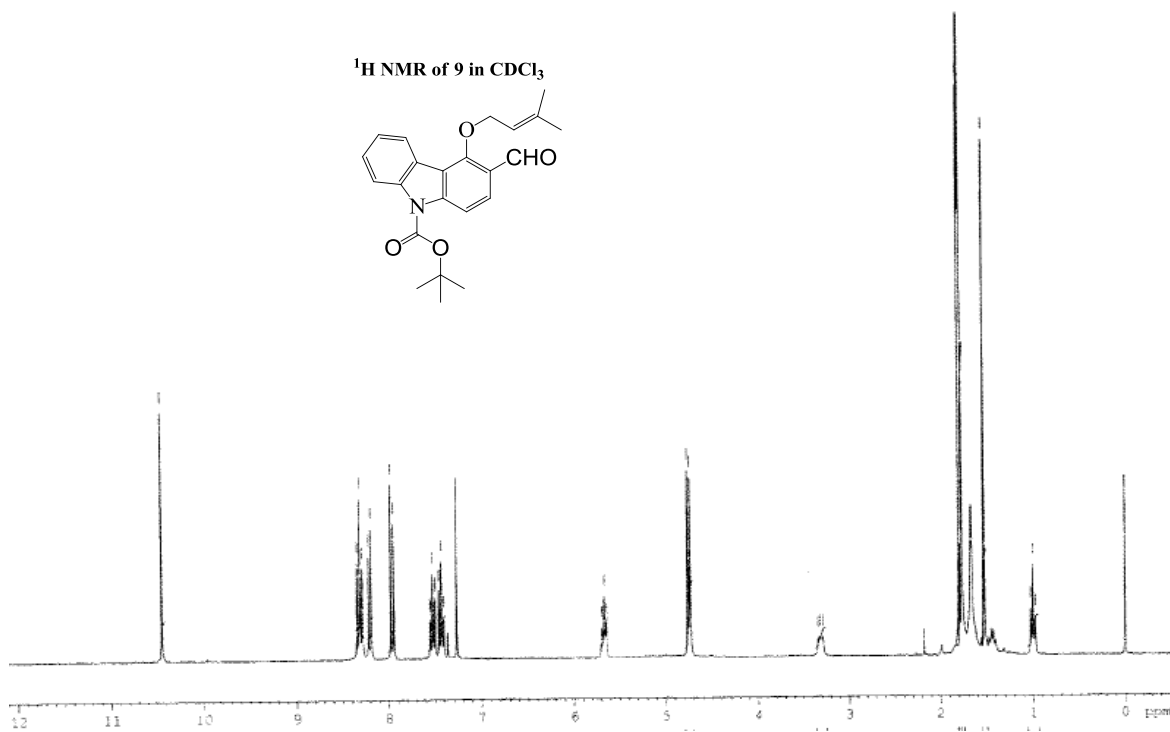

<sup>13</sup>C NMR of 9 in CDCl<sub>3</sub>

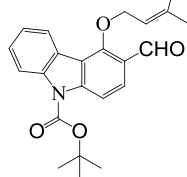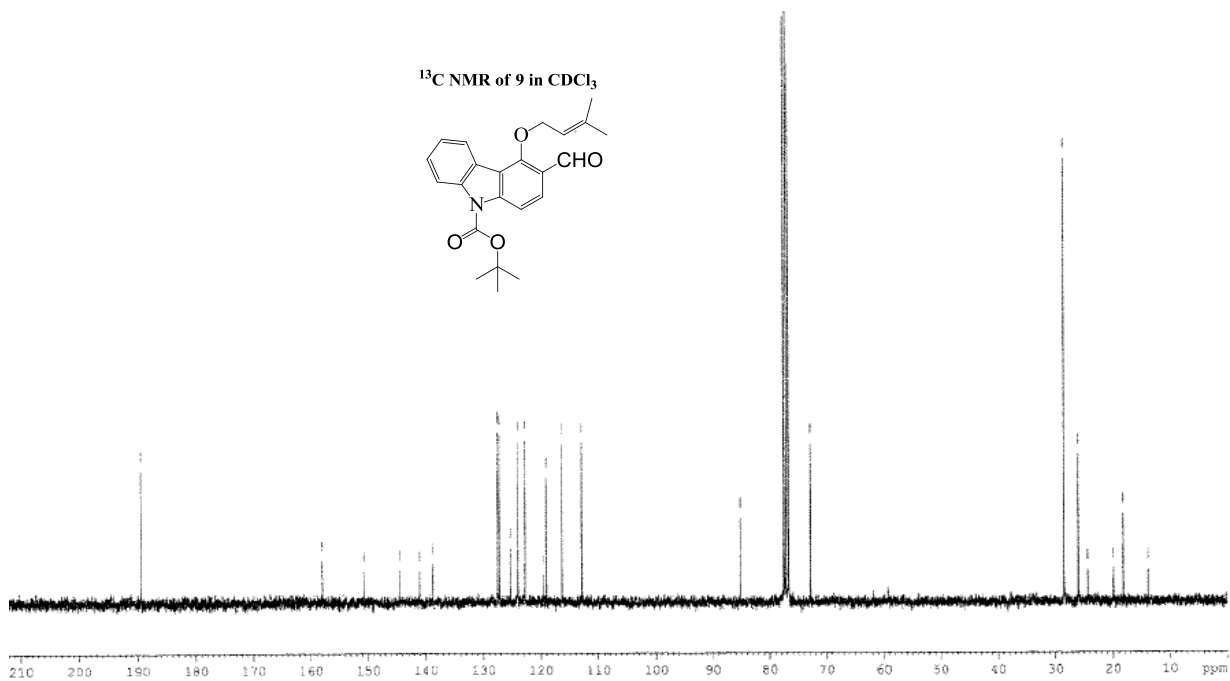

<sup>1</sup>H NMR of 11a in DMSO

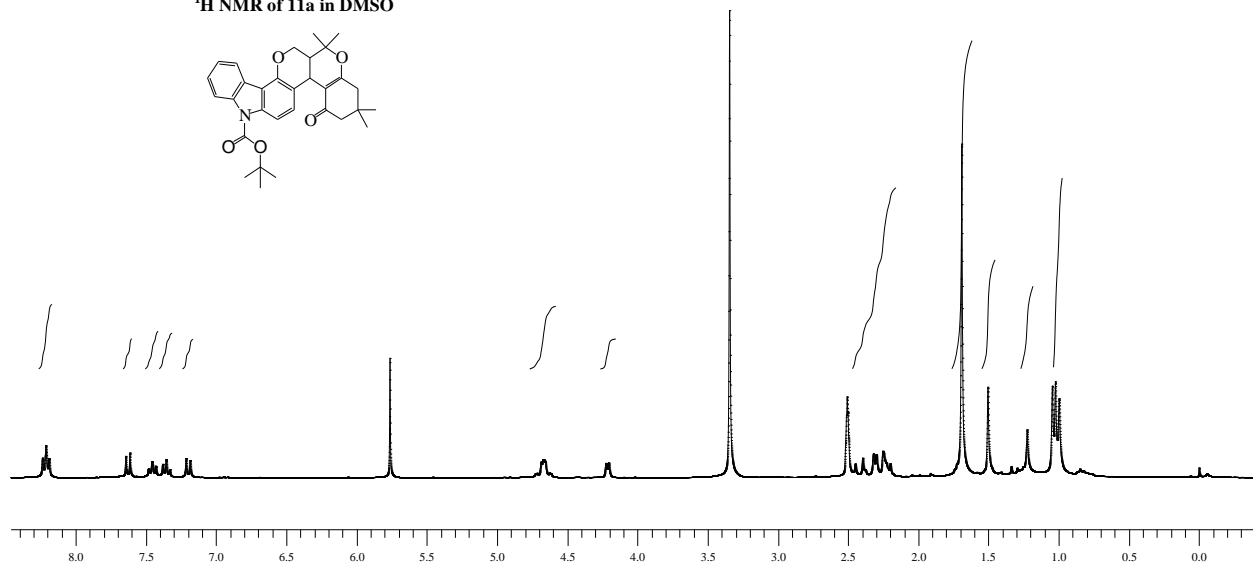

<sup>13</sup>C NMR of 11a in CDCl<sub>3</sub>

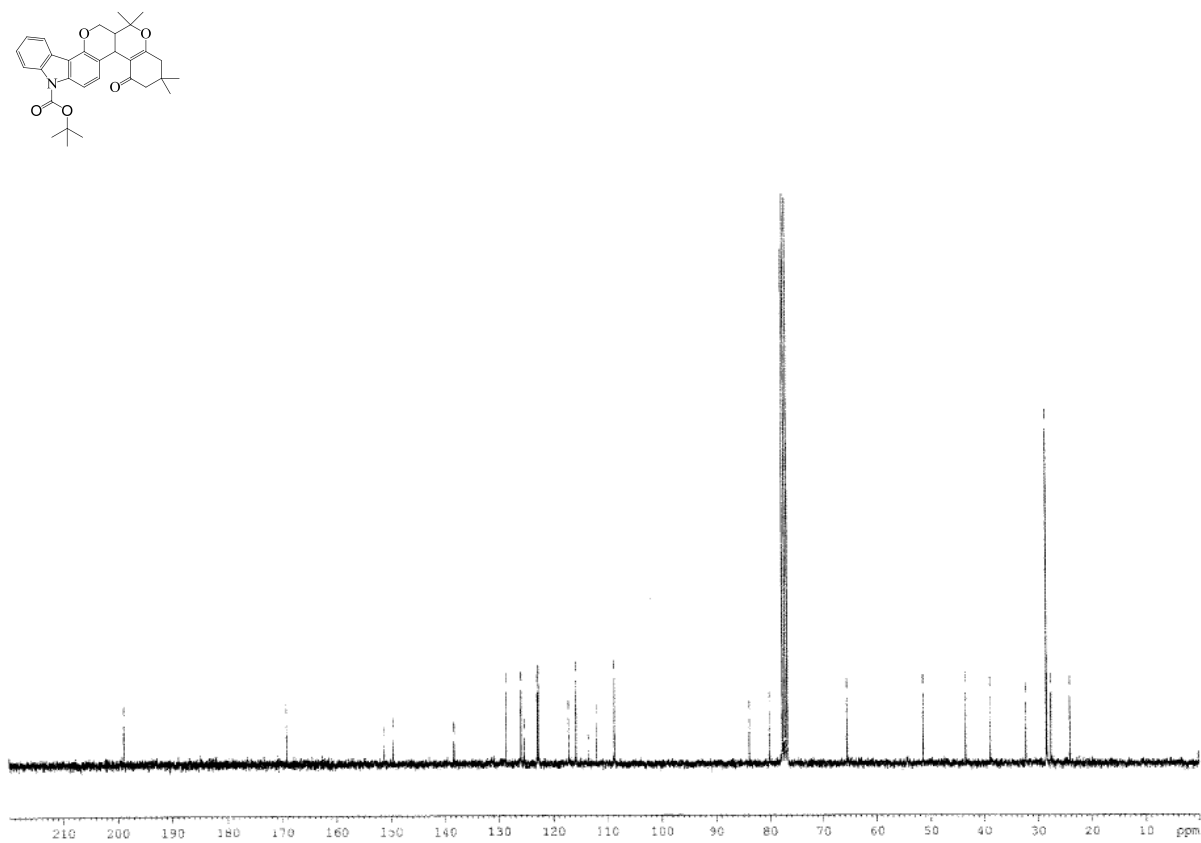

<sup>1</sup>H NMR of 11b in DMSO

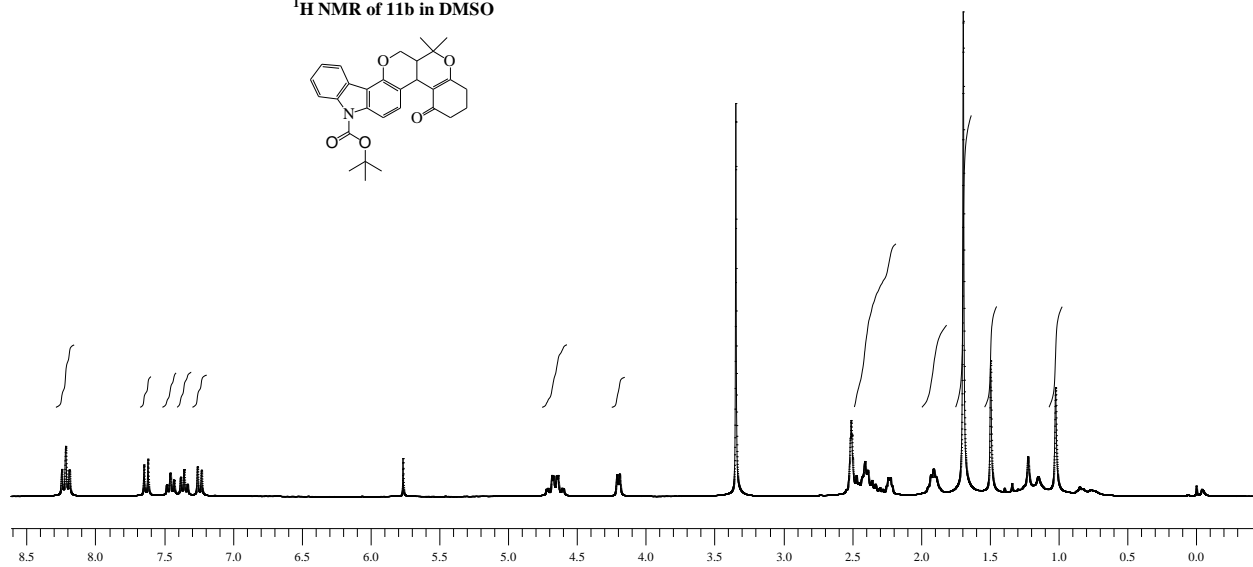

<sup>13</sup>C NMR of 11b in CDCl<sub>3</sub>

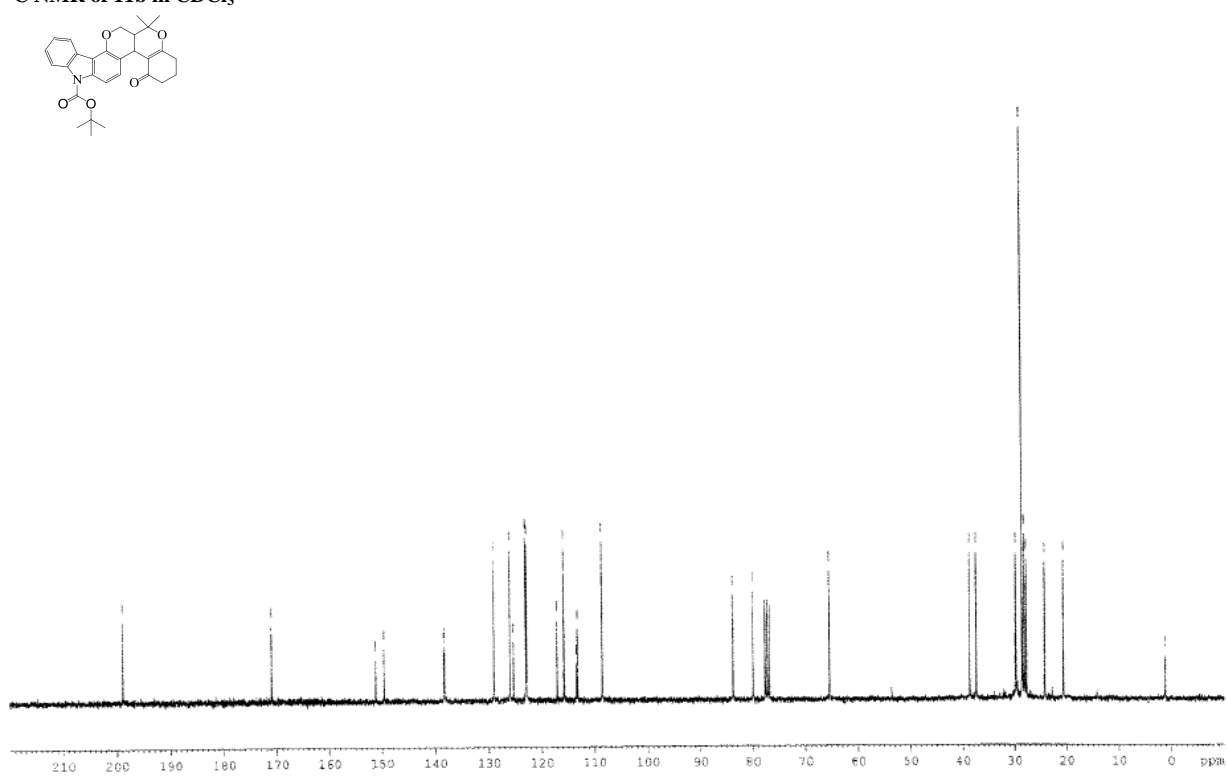

<sup>1</sup>H NMR of 11d in CDCl<sub>3</sub>

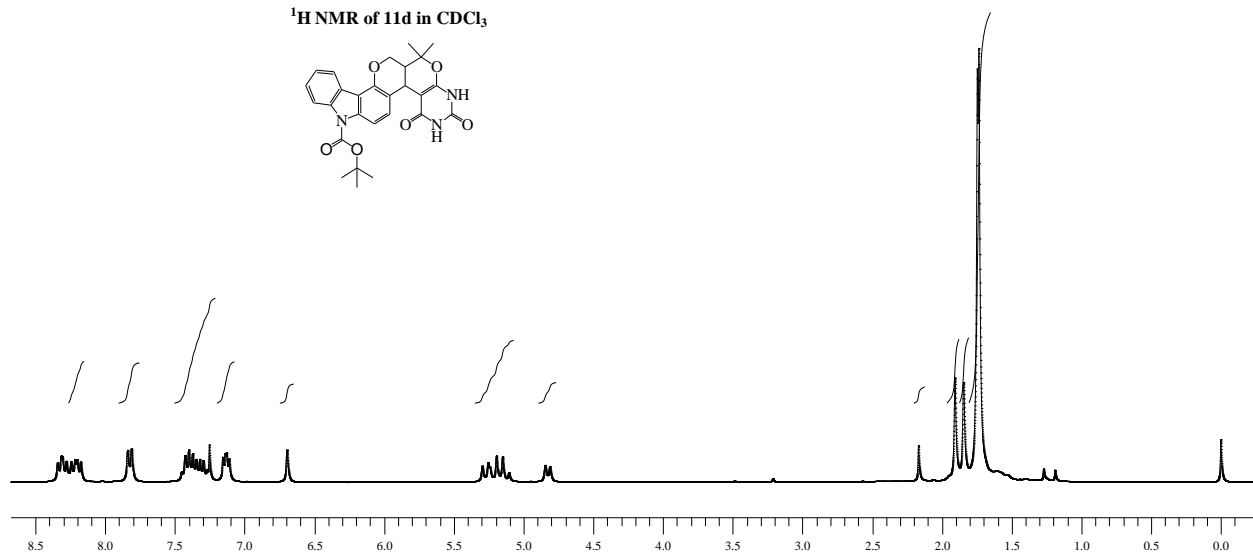

<sup>13</sup>C NMR of 11d in CDCl<sub>3</sub>

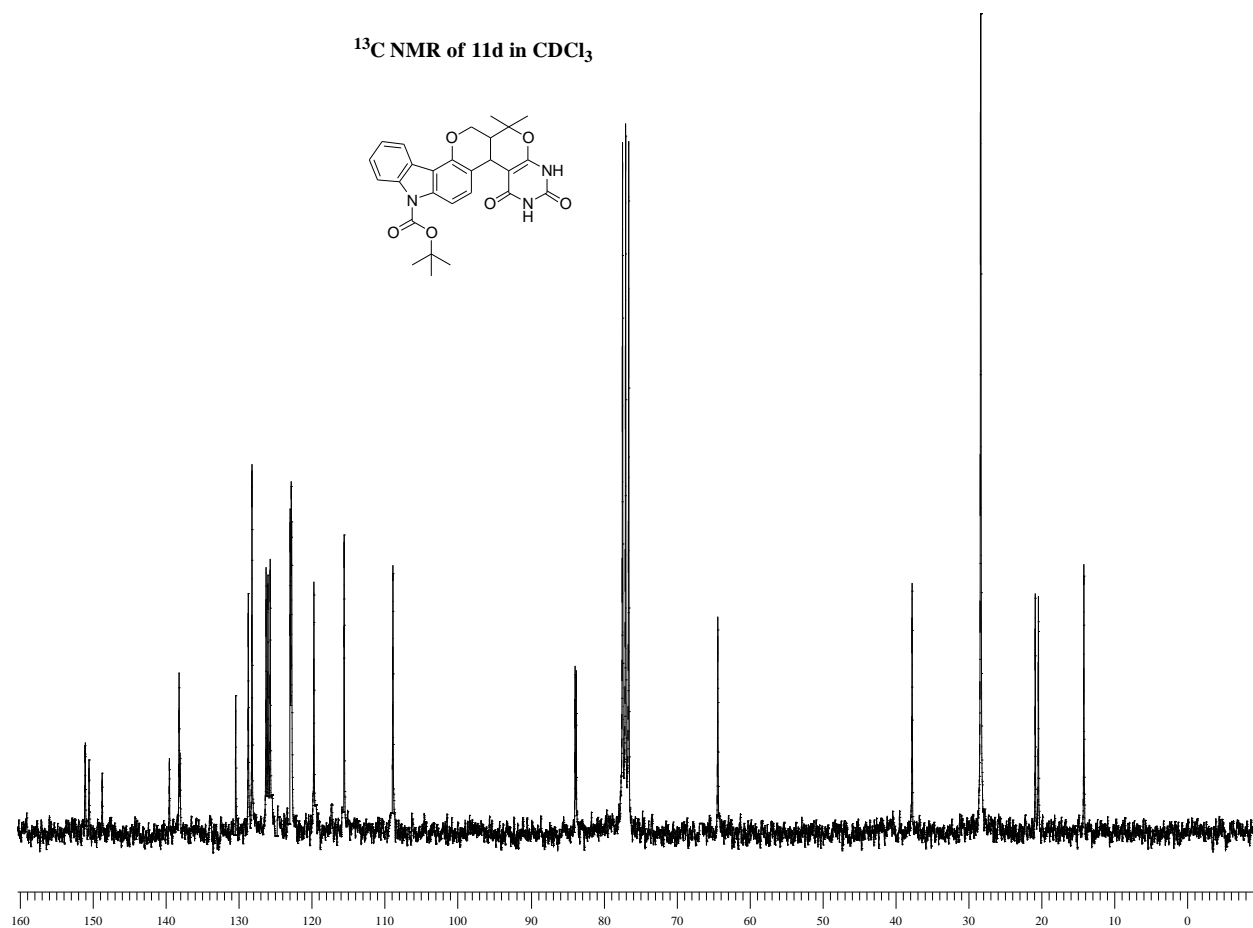

<sup>1</sup>H NMR of 11e in CDCl<sub>3</sub>

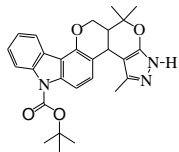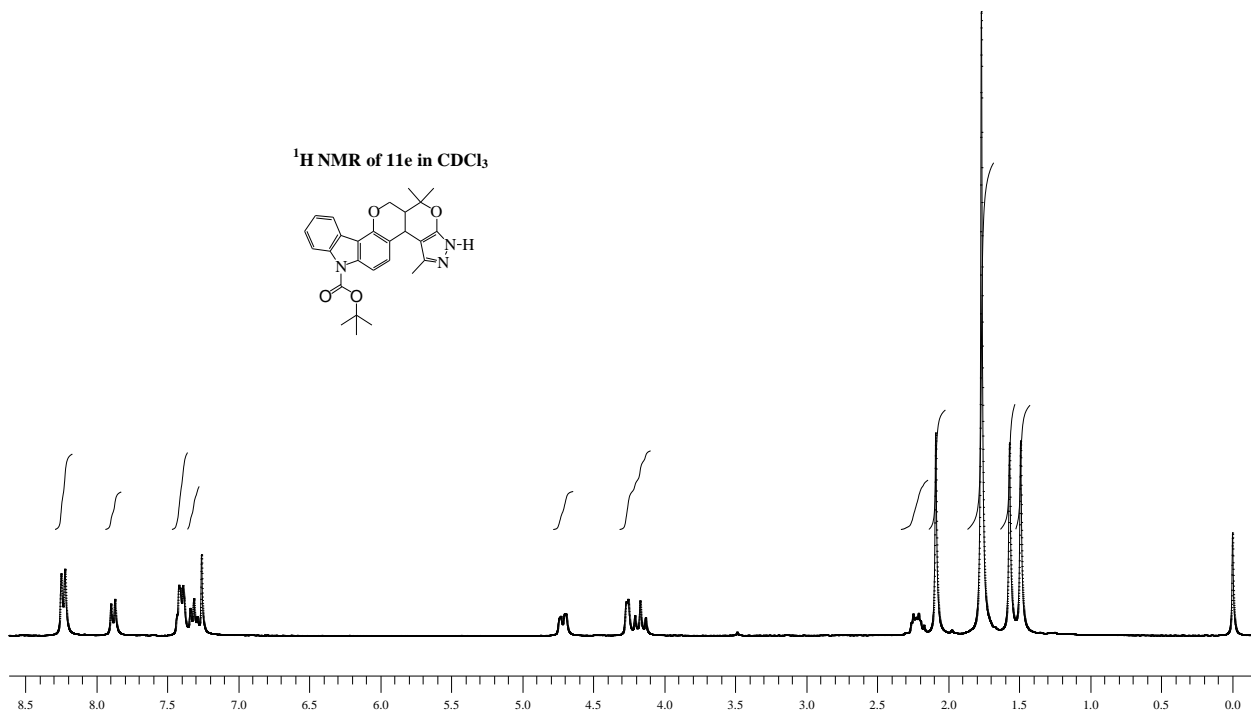

<sup>13</sup>C NMR of 11e in CDCl<sub>3</sub>

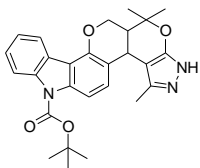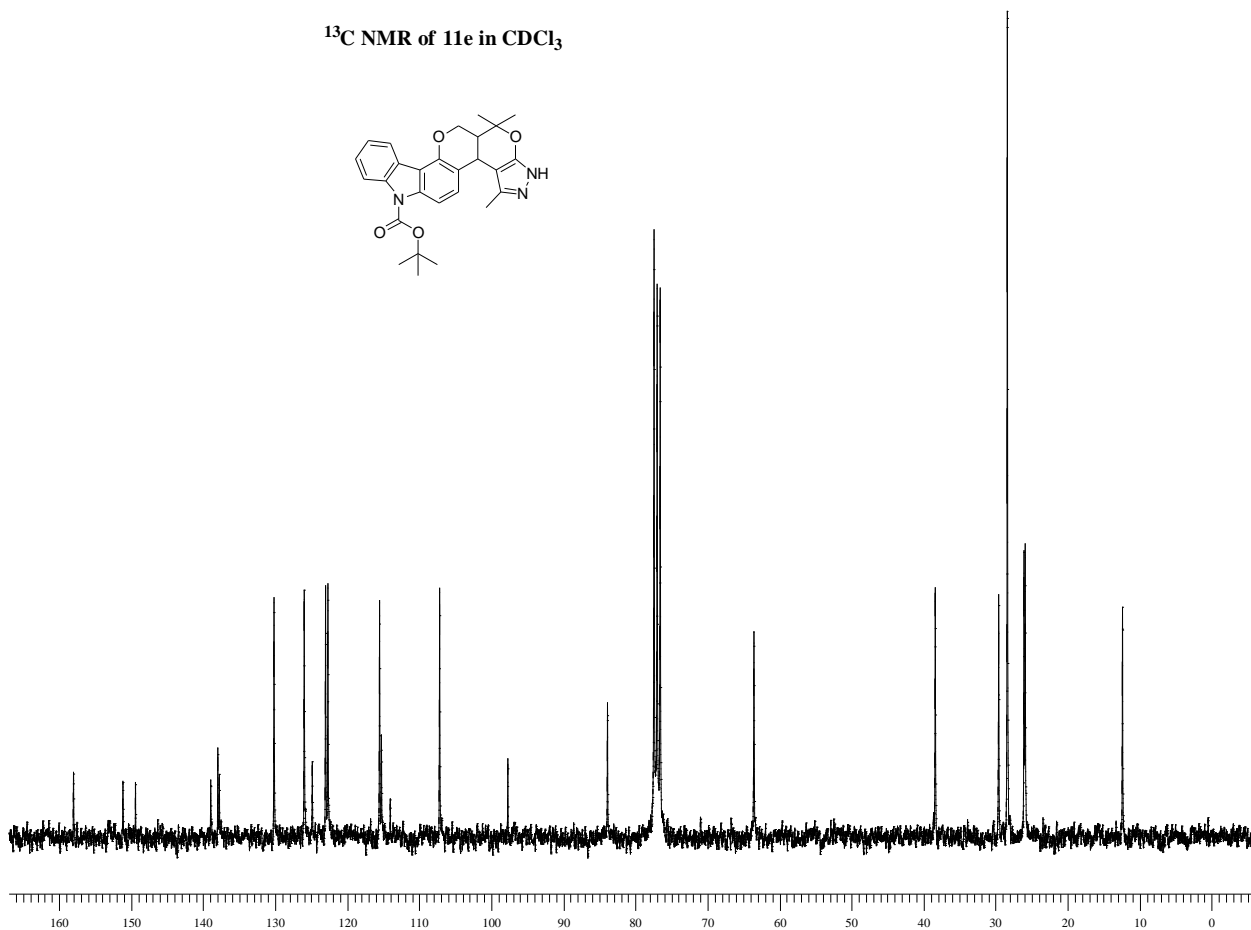

<sup>1</sup>H NMR of 11f in CDCl<sub>3</sub>

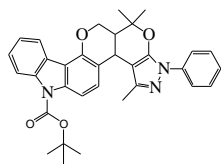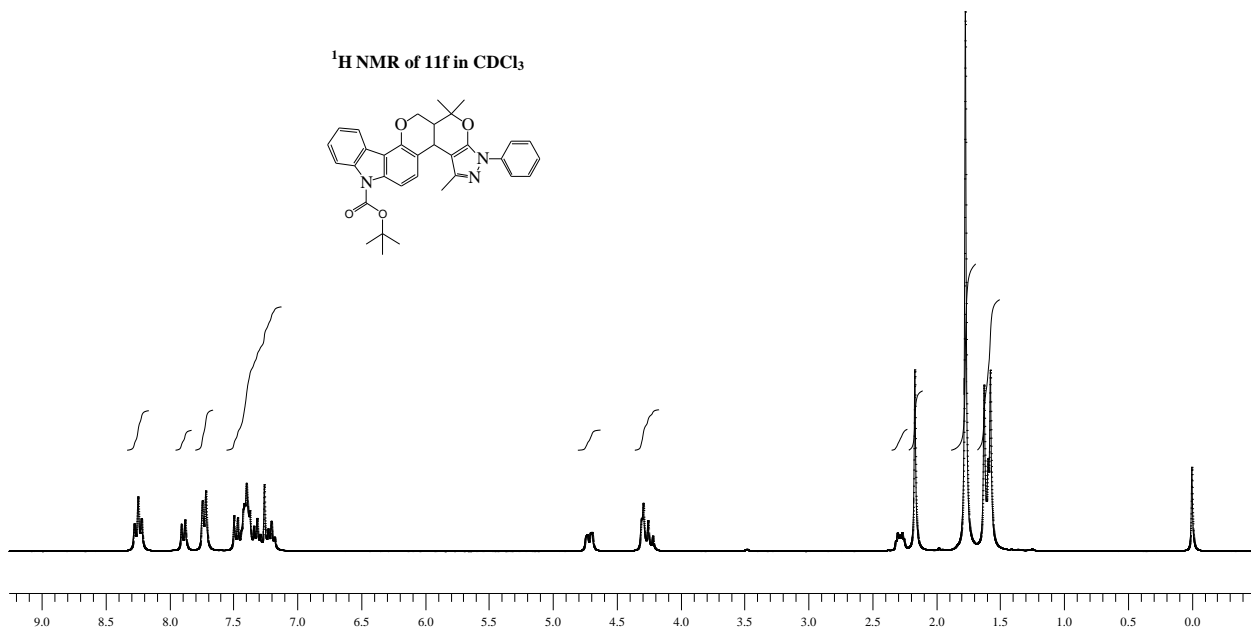

<sup>13</sup>C NMR of 11f in CDCl<sub>3</sub>

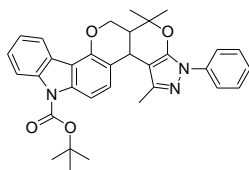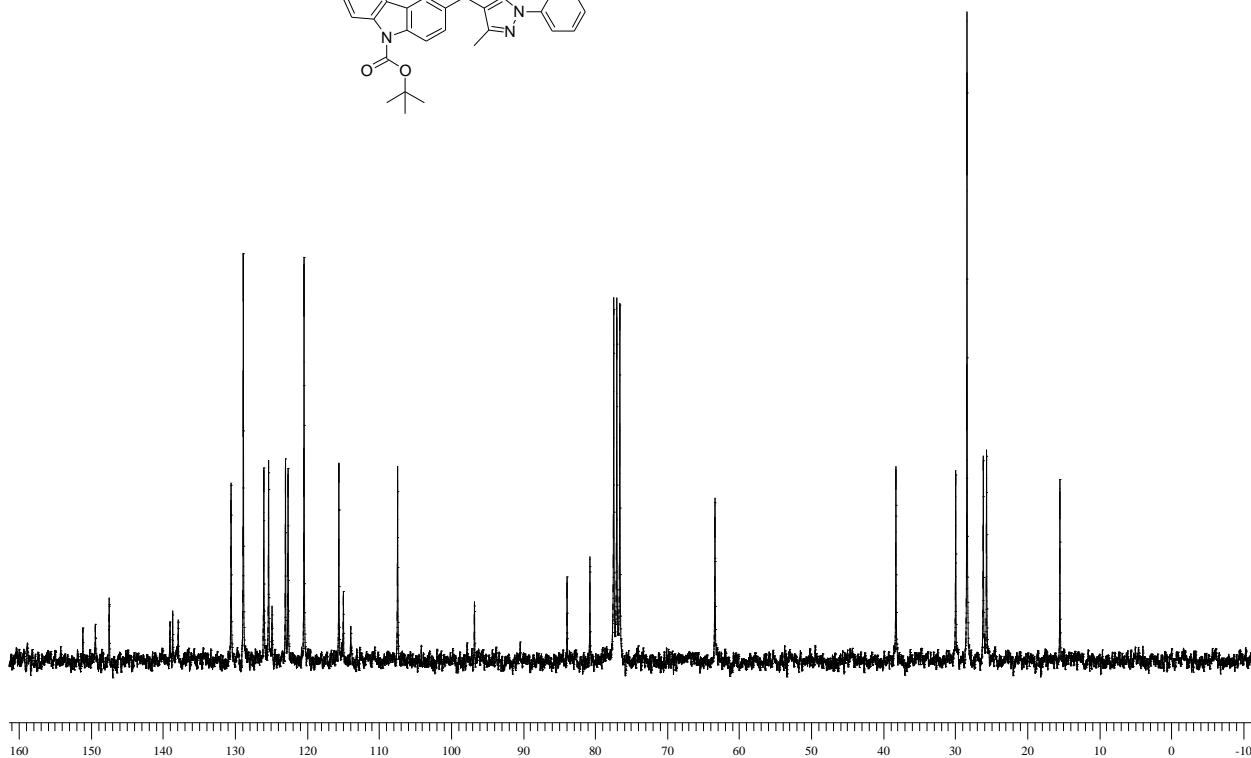

<sup>1</sup>H NMR of 11g in CDCl<sub>3</sub>

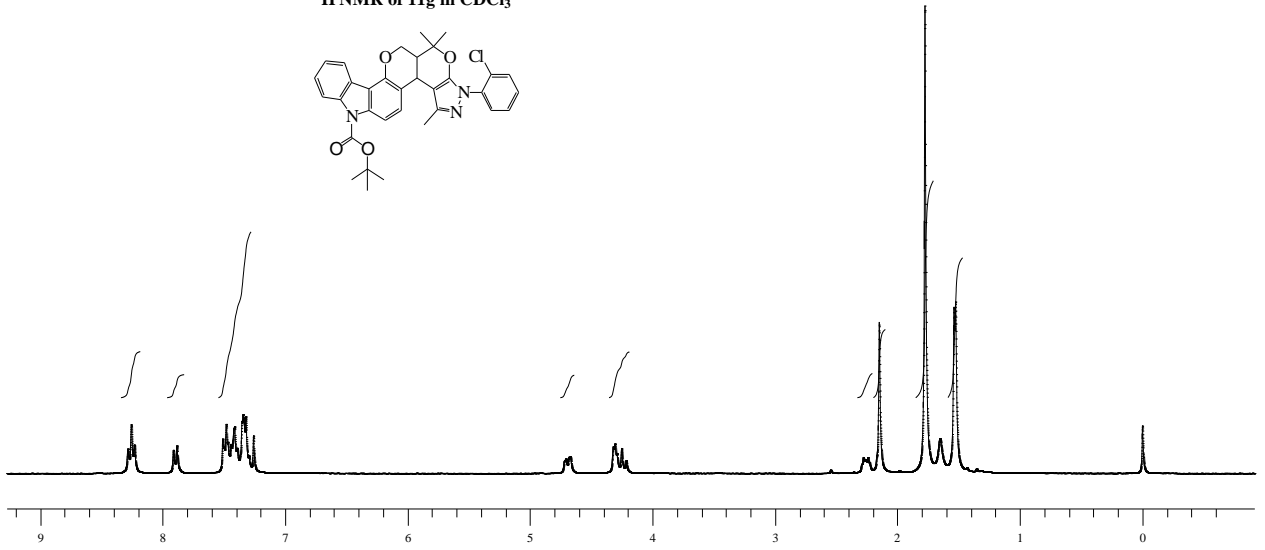

<sup>13</sup>C NMR of 11g in CDCl<sub>3</sub>

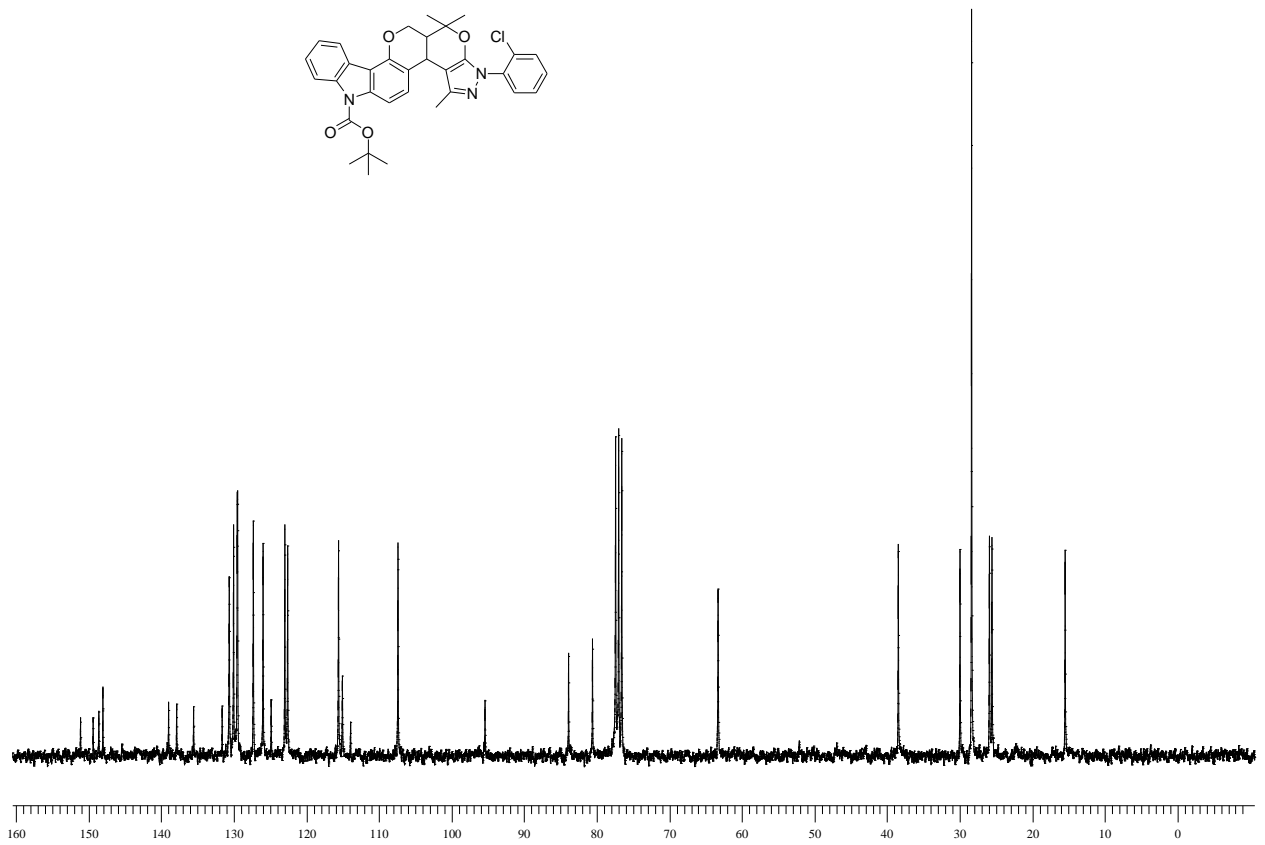



<sup>1</sup>H NMR of 11h in CDCl<sub>3</sub>

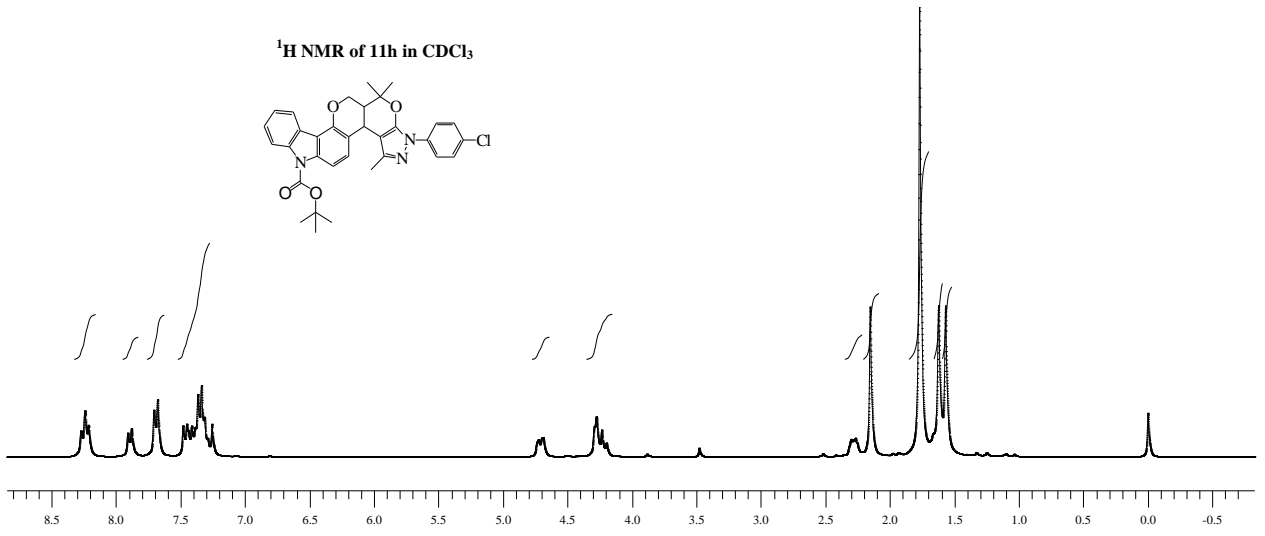

<sup>13</sup>C NMR of 11h in CDCl<sub>3</sub>

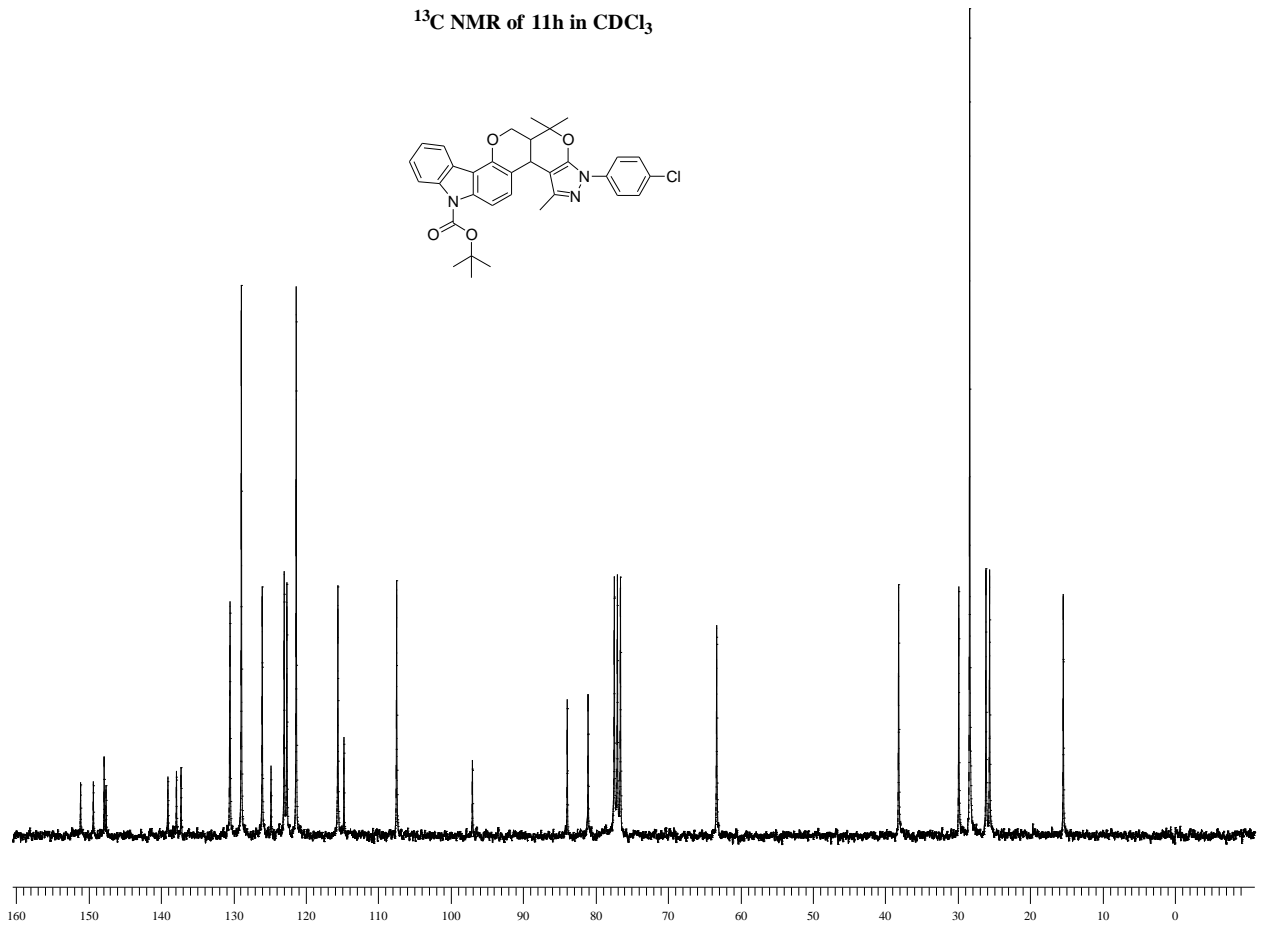

**<sup>1</sup>H NMR of 11i in CDCl<sub>3</sub>**

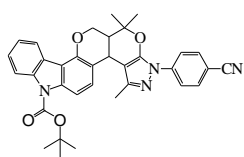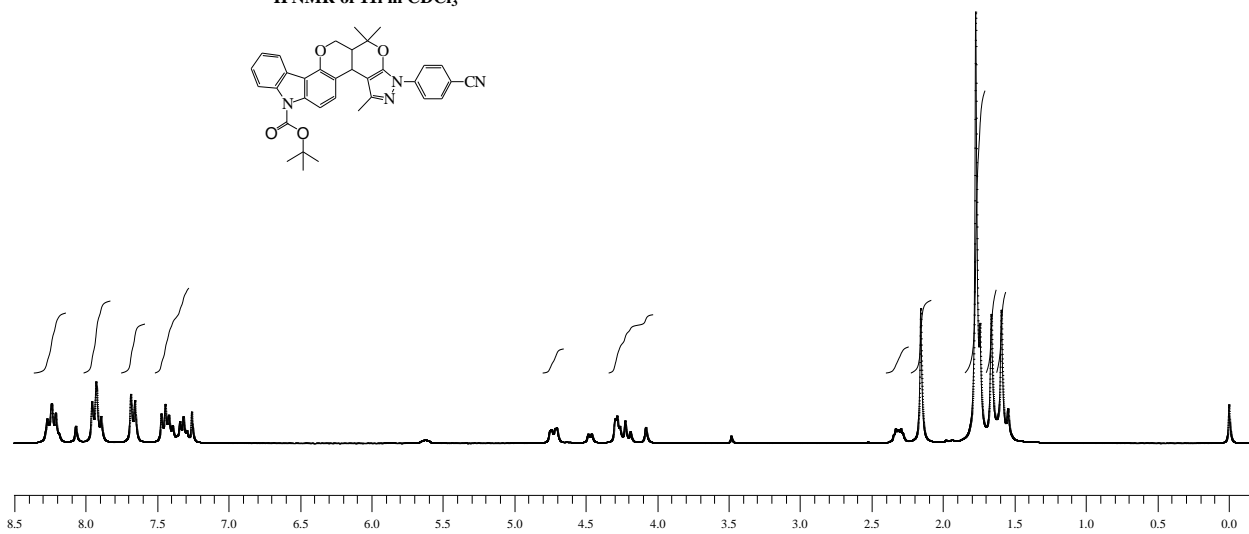

**<sup>13</sup>C NMR of 11i in CDCl<sub>3</sub>**

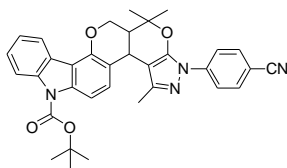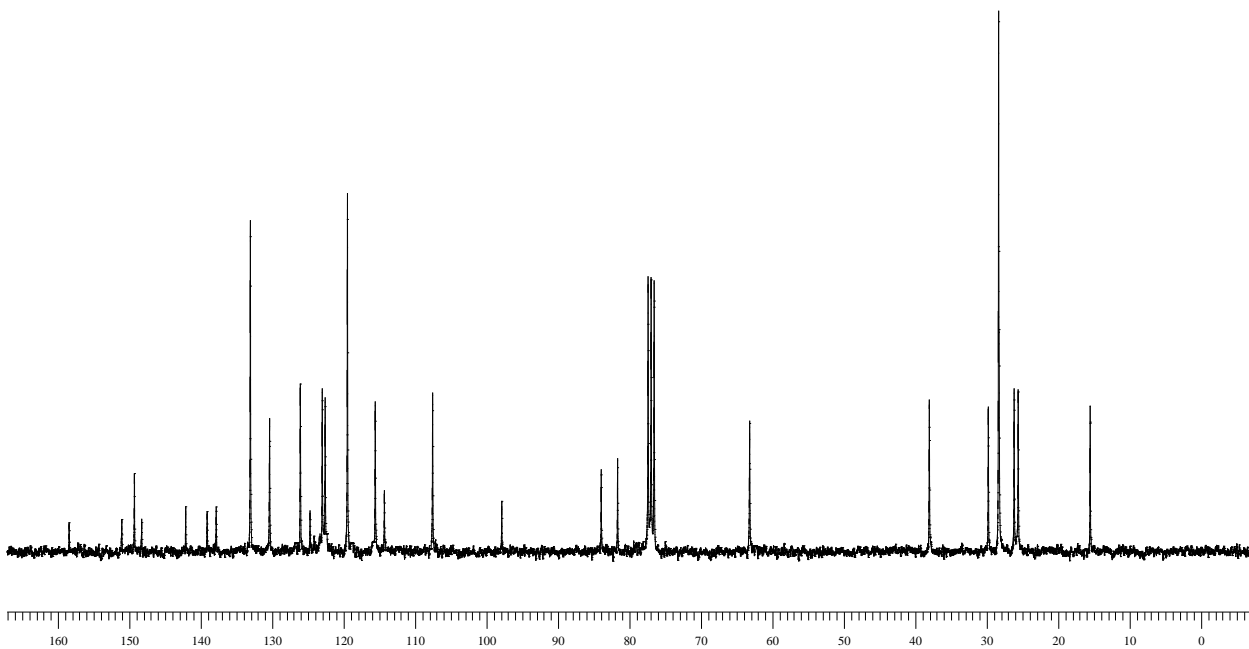

**<sup>1</sup>H NMR of 11j in CDCl<sub>3</sub>**

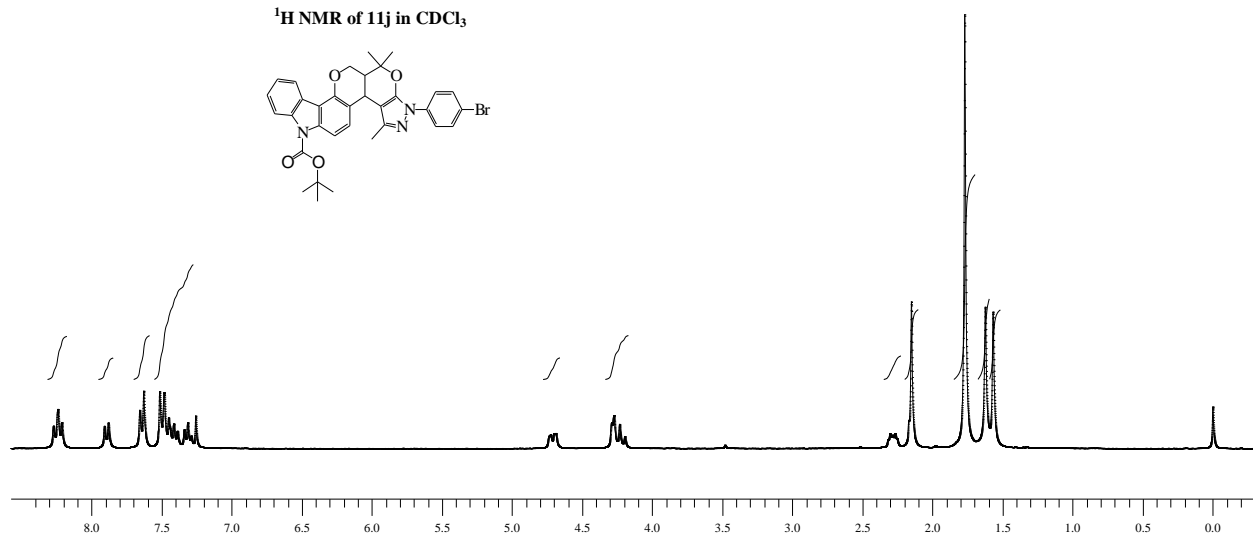

**<sup>13</sup>C NMR of 11j in CDCl<sub>3</sub>**

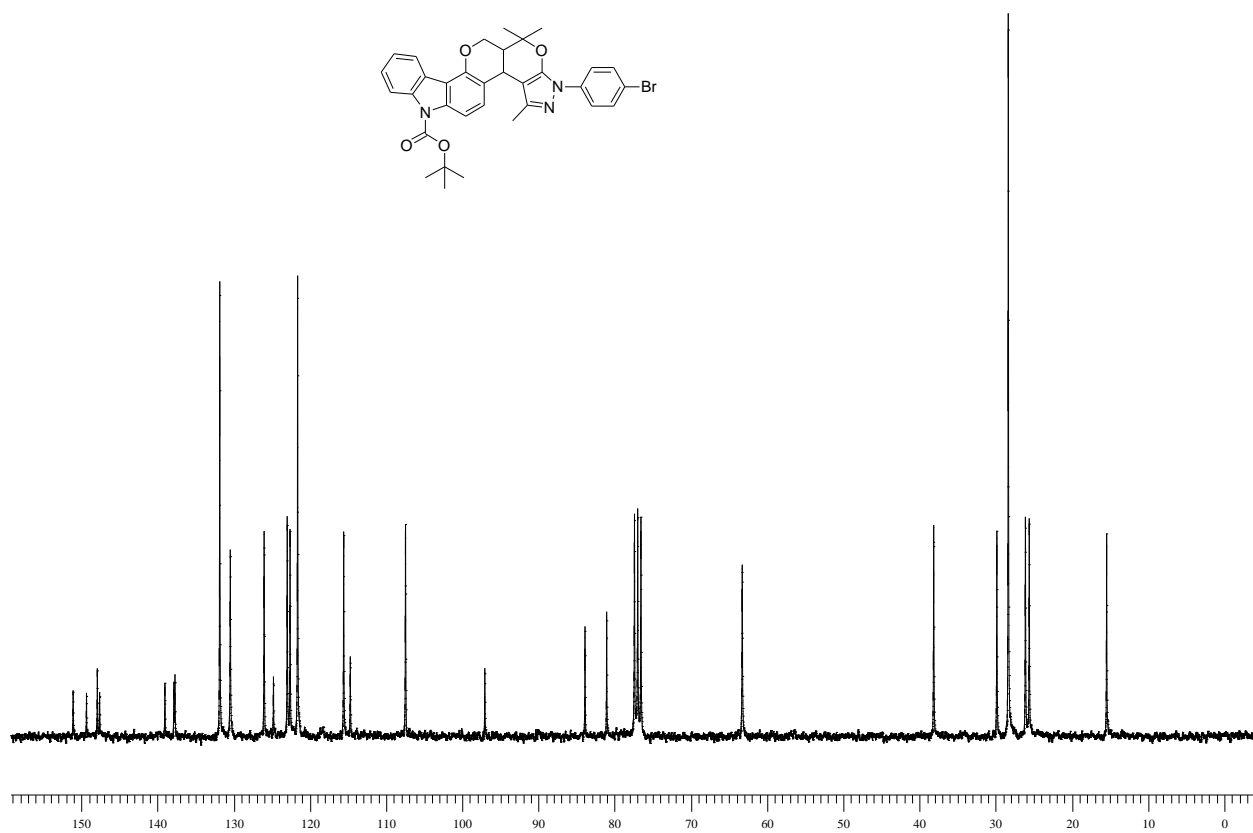

<sup>1</sup>H NMR of 12a in CDCl<sub>3</sub>

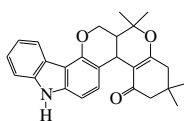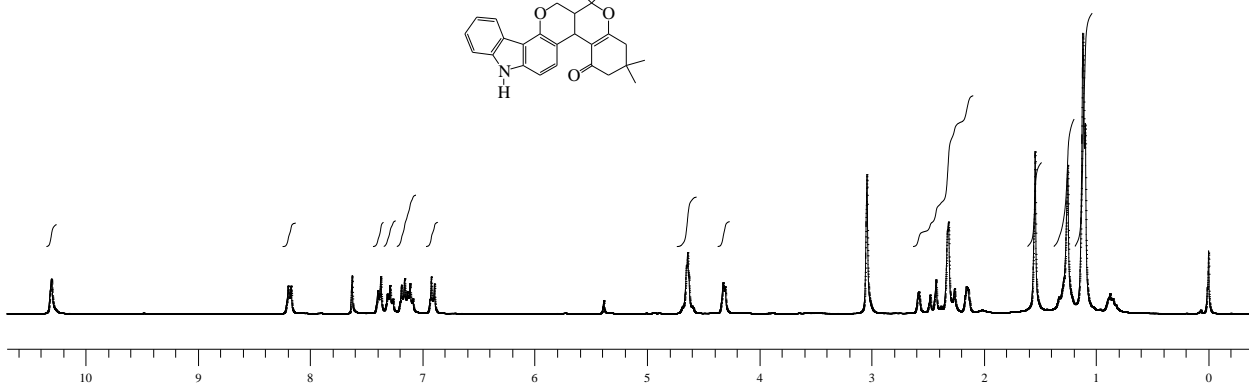

<sup>13</sup>C NMR of 12a in CDCl<sub>3</sub>+ DMSO

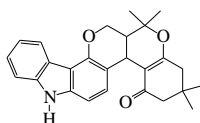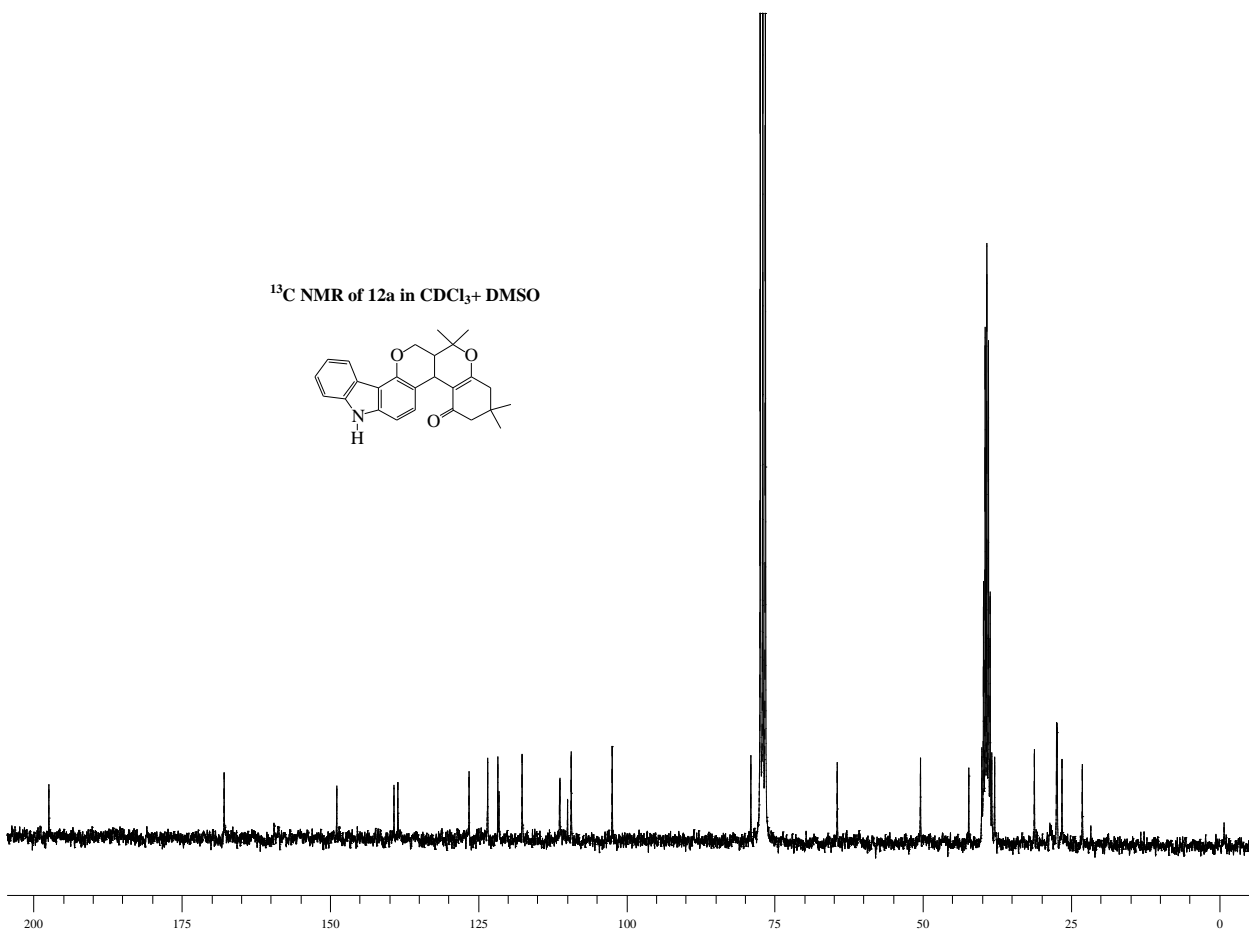

**<sup>1</sup>H NMR of 12b in DMSO**

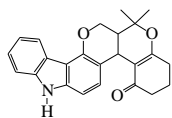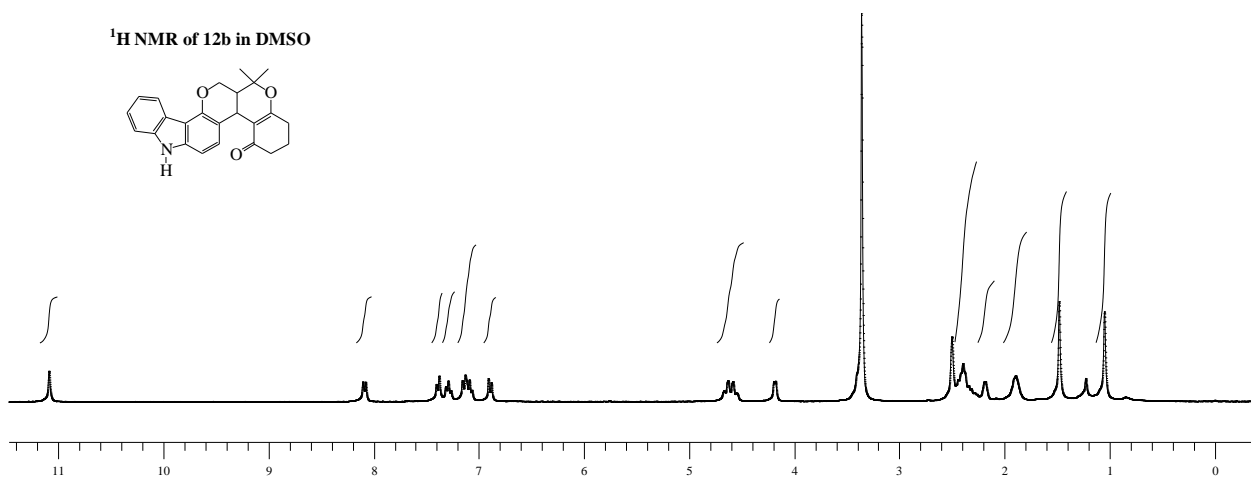

**<sup>13</sup>C NMR of 12b in DMSO**

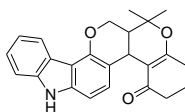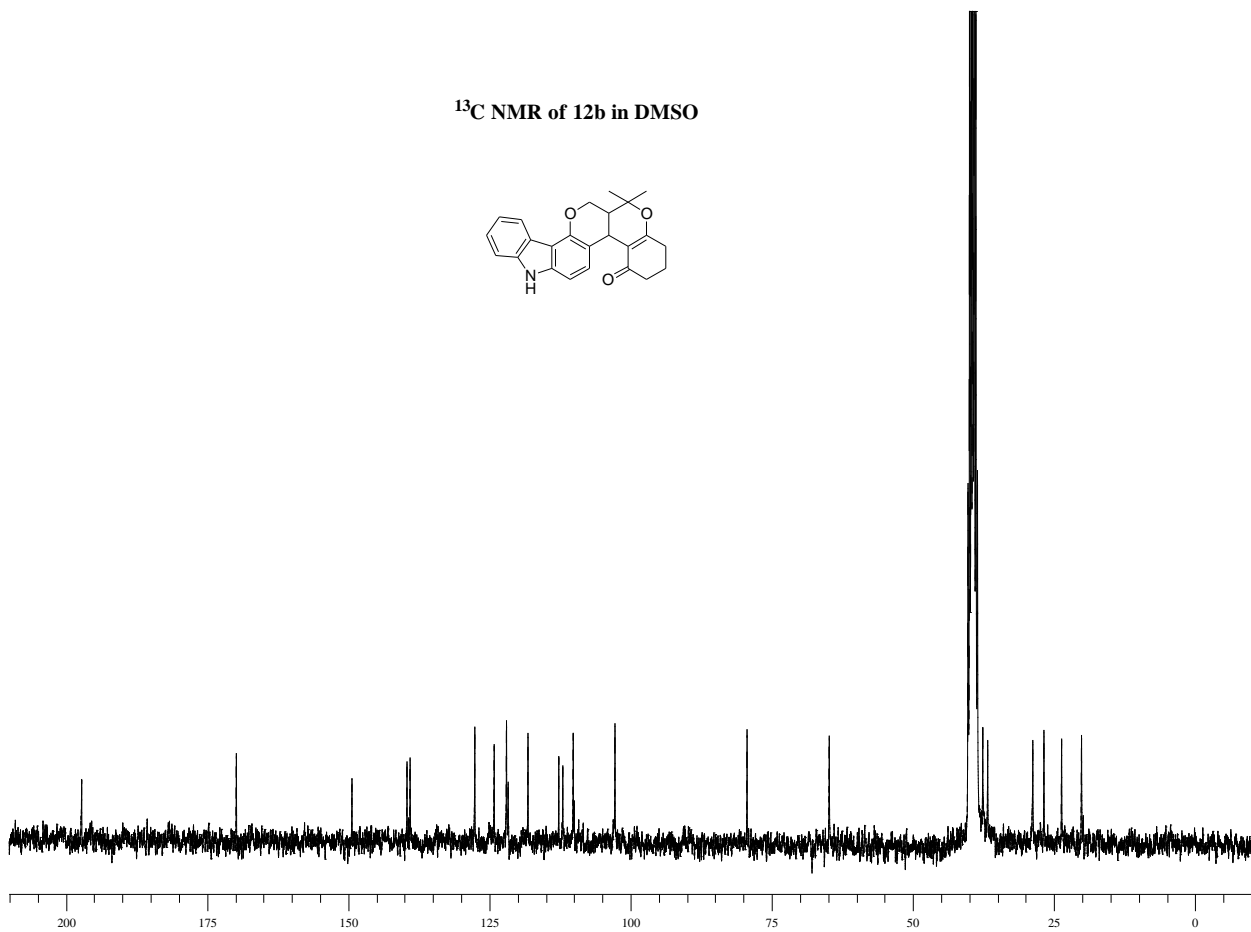

**<sup>1</sup>H NMR of 12f in DMSO**

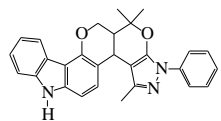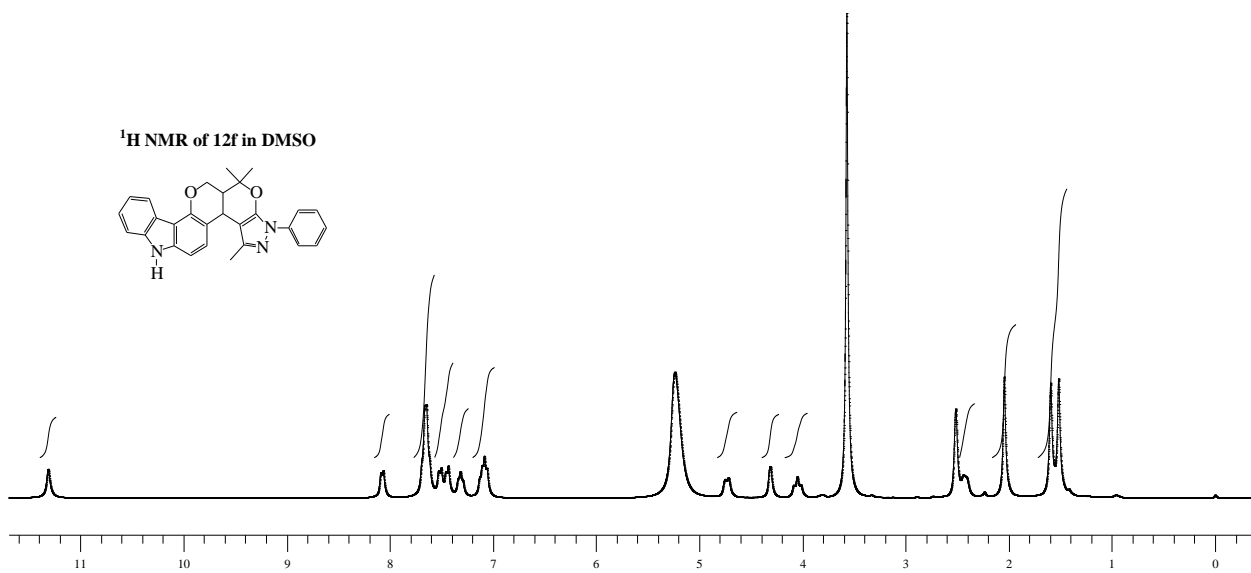

**<sup>13</sup>C NMR of 12f in DMSO**

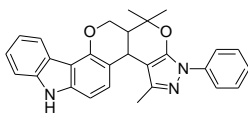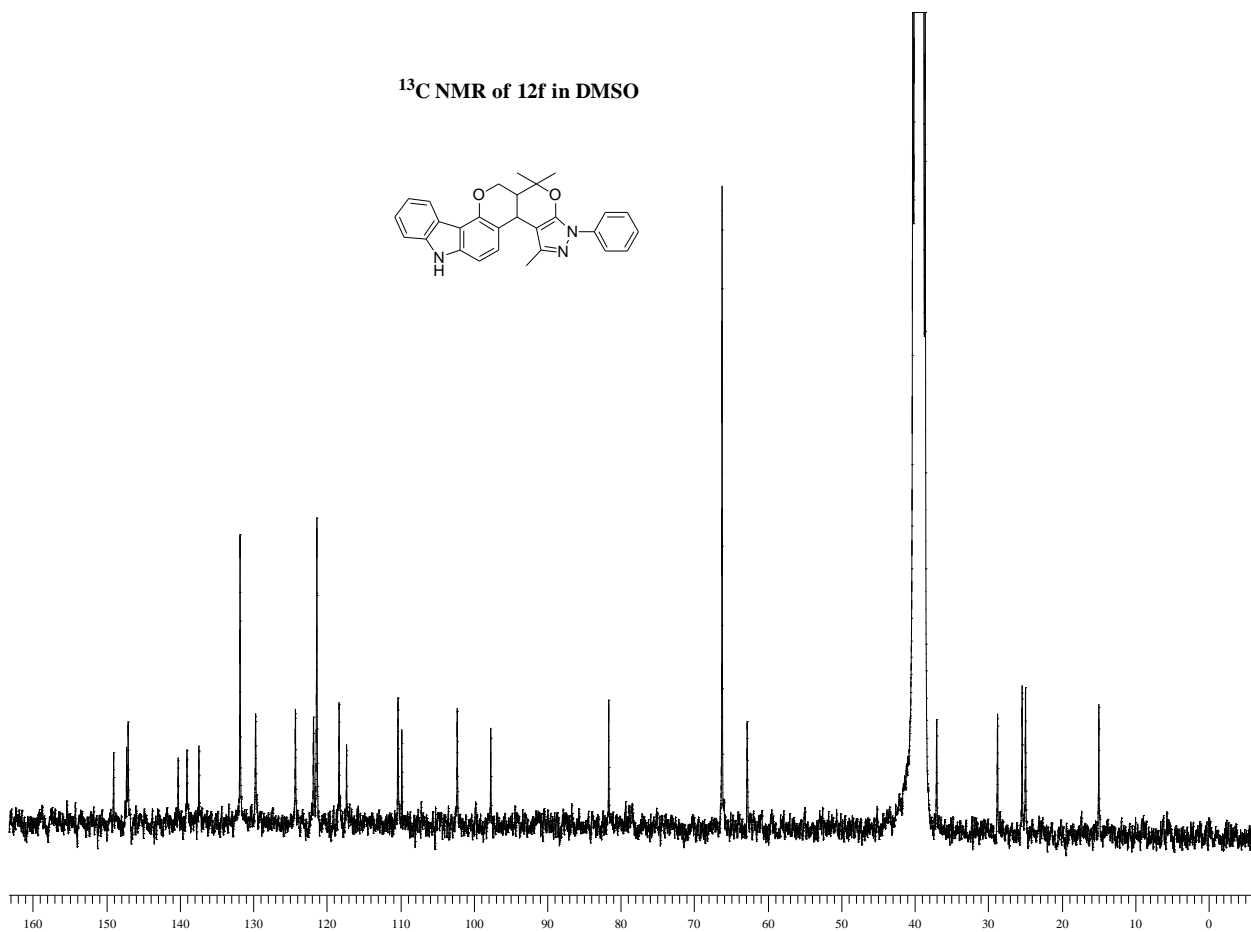

**<sup>1</sup>H NMR of 12i in DMSO**

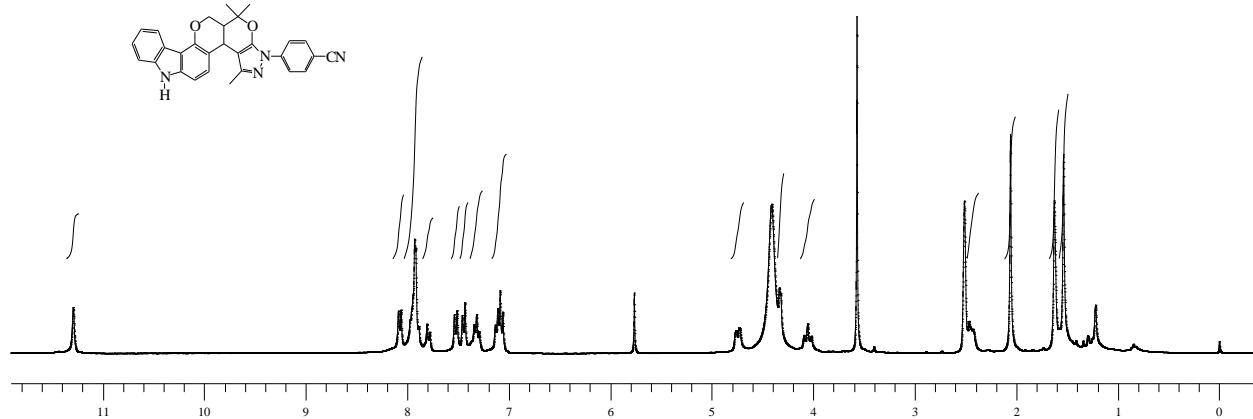

**<sup>13</sup>C NMR of 12i in DMSO**

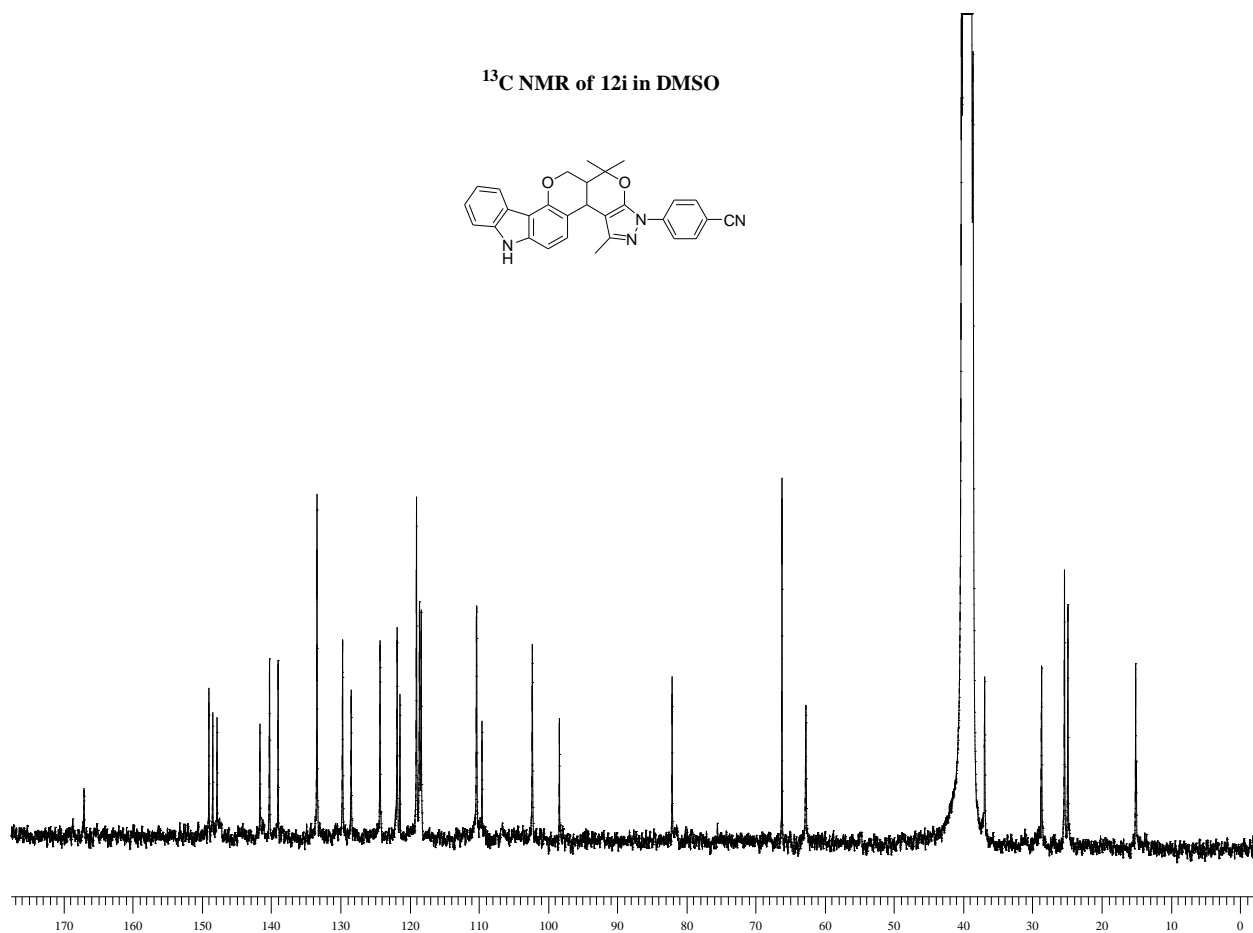

<sup>1</sup>H NMR of 12j in DMSO

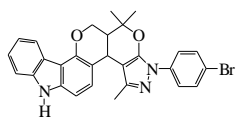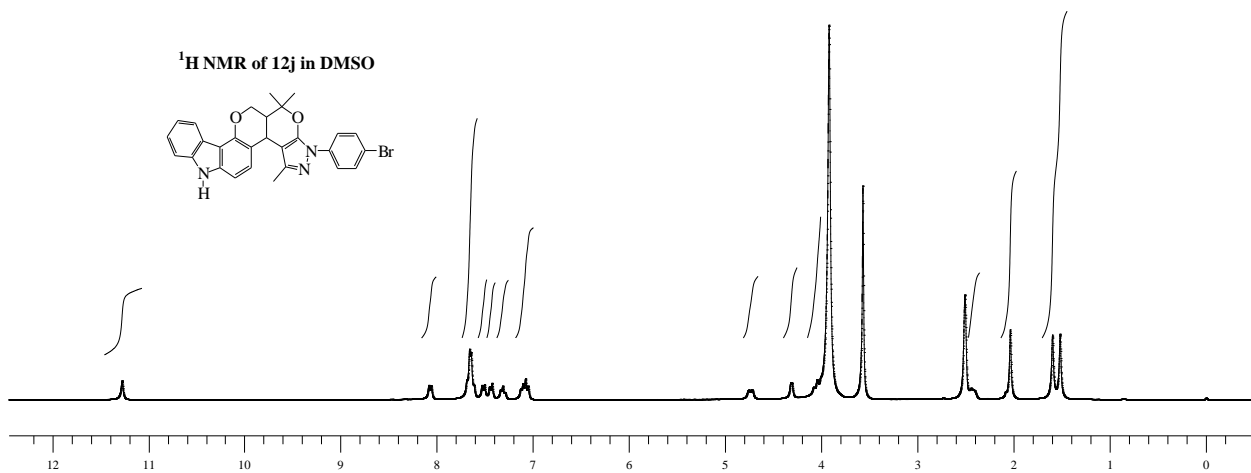

<sup>13</sup>C NMR of 12j in DMSO

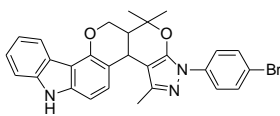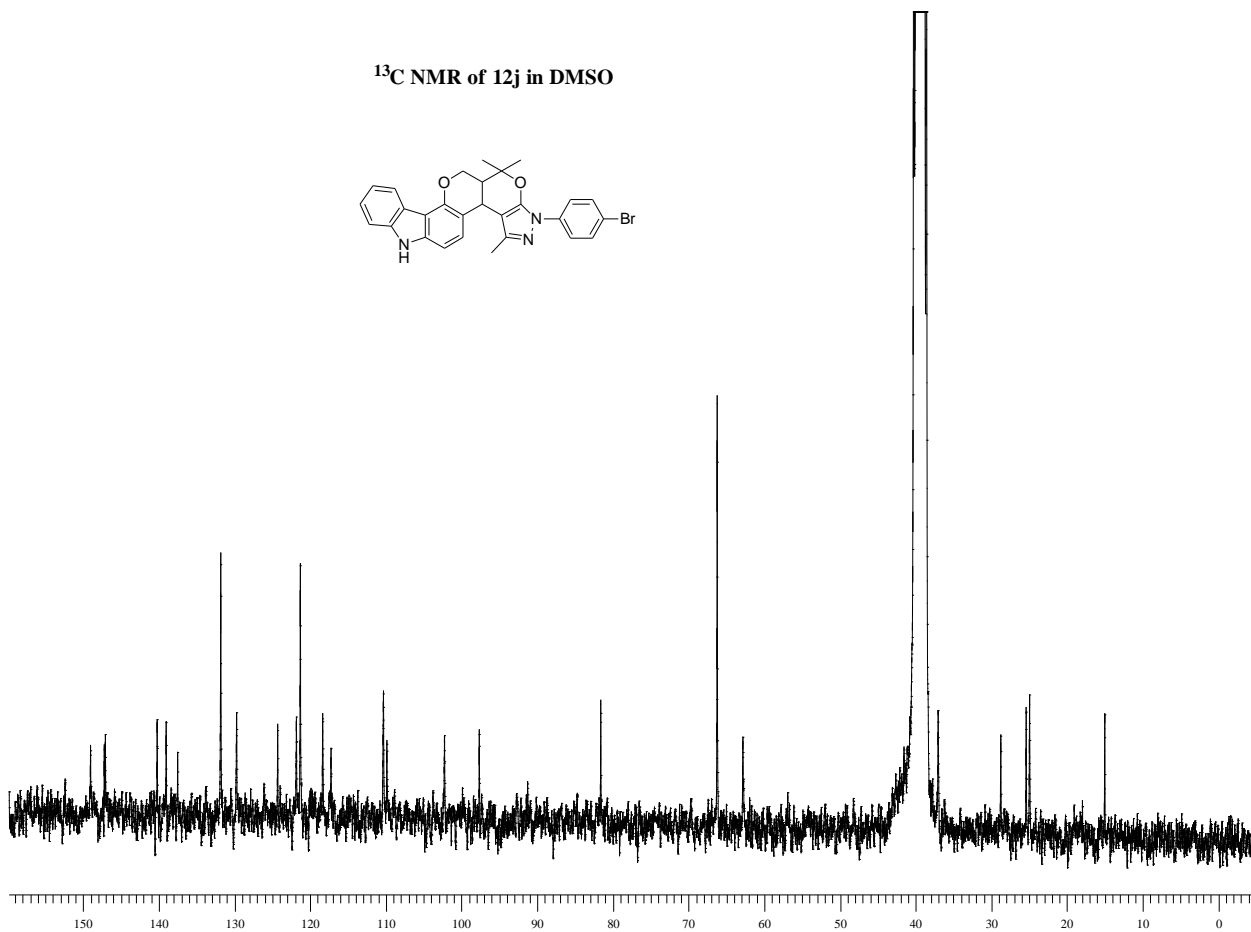

Supplement: c6nj01580h1.pdf [file c6nj01580h1.pdf]
